# Supplementary material for: Selective hydrogenation of nitroaromatics catalyzed by surface Pt-rich high-entropy alloy catalysts at room temperature
Source: Royal Society of Chemistry journal article supplement (doi:10.1039/d4cy01542h), 2025-01-01
Supplement: d4cy01542h1.pdf [file d4cy01542h1.pdf]

## Supplementary Information

### Selective hydrogenation of nitroaromatics catalyzed by surface Pt-rich high-entropy alloy catalyst at room temperature

Mingzhen Li,<sup>a,b</sup> Yongsheng Li,<sup>a</sup> Zekun Jing,<sup>b</sup> Deshun Huang,<sup>c</sup> Guozong Yue,<sup>c</sup> Yakun Guo,<sup>b,\*</sup> and Maobing Shuai<sup>a,c,\*</sup>

<sup>a</sup> State Key Laboratory of Environment-friendly Energy Materials, Southwest University of Science and Technology, Mianyang 621010, China

<sup>b</sup> Science and Technology on Surface Physics and Chemistry Laboratory, Jiangyou 621908, China

<sup>c</sup> Institute of Materials, China Academy of Engineering Physics, Mianyang 621907, China

\* Corresponding authors.

E-mail: shuaimb@sina.com (Maobing Shuai); yakunguo@126.com (Yakun Guo)

## 1. Supplementary Figures

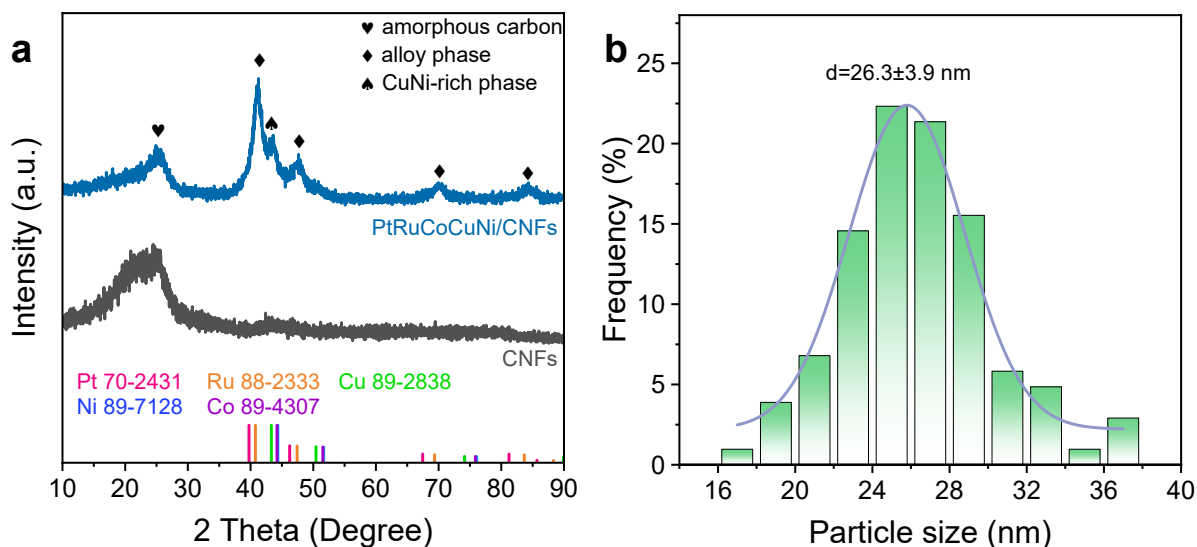

**Figure S1.** (a) XRD pattern of CNFs and PtRuCoCuNi/CNFs. (b) Particle size distribution of PtRuCoCuNi HEA nanoparticles.

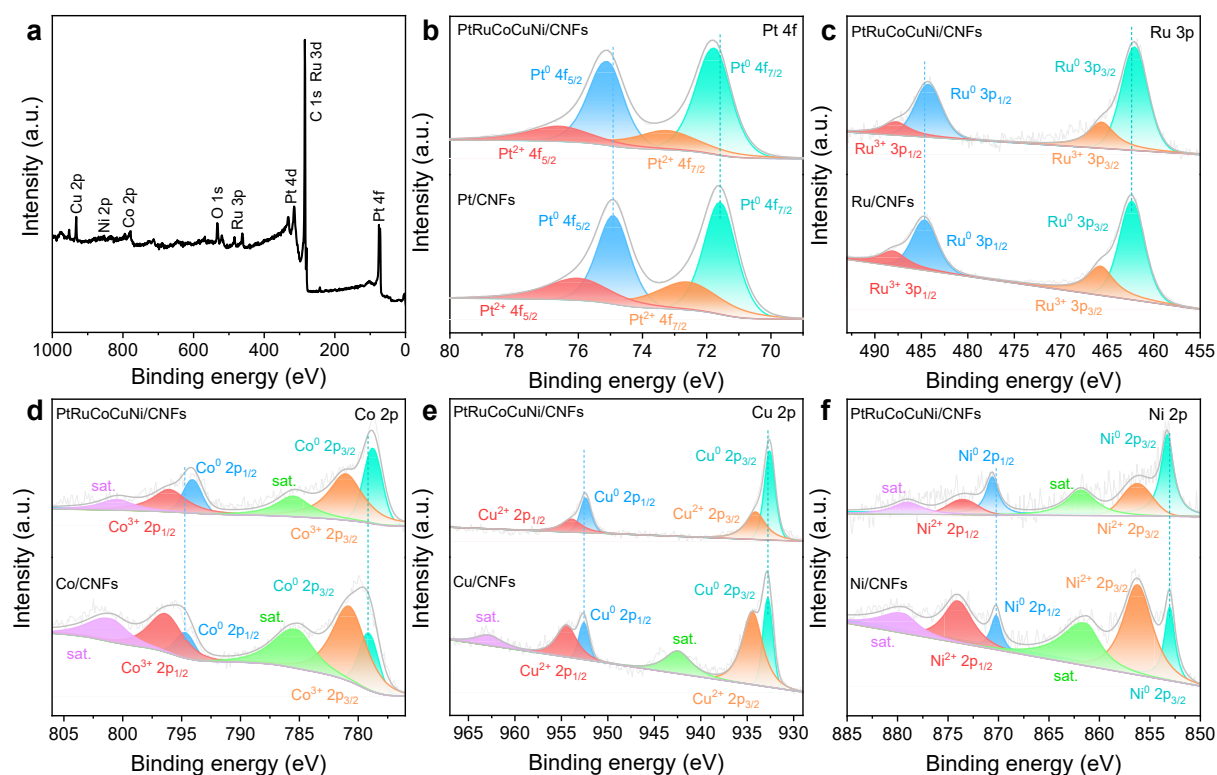

**Figure S2.** XPS analysis of PtRuCoCuNi/CNFs. (a) full spectra. (b) Pt 4f XPS spectrums. (c) Ru 3p XPS spectra. (d) Co 2p XPS spectra. (e) Cu 2p XPS spectra. (f) Ni 2p XPS spectra.

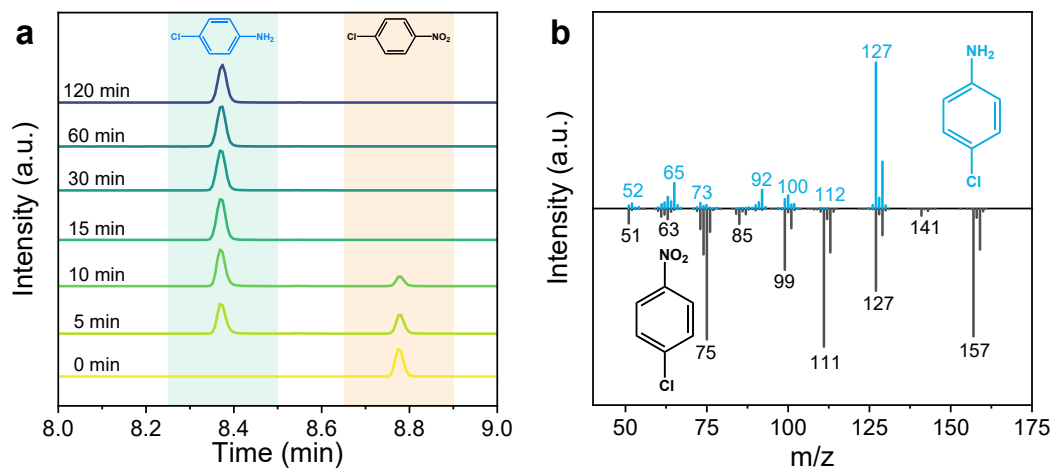

**Figure S3.** GC-MS analysis of the products after catalytic *p*-CNB hydrogenation by PtRuCoCuNi/CNFs with different reaction times. (a) GC results, (b)MS results.

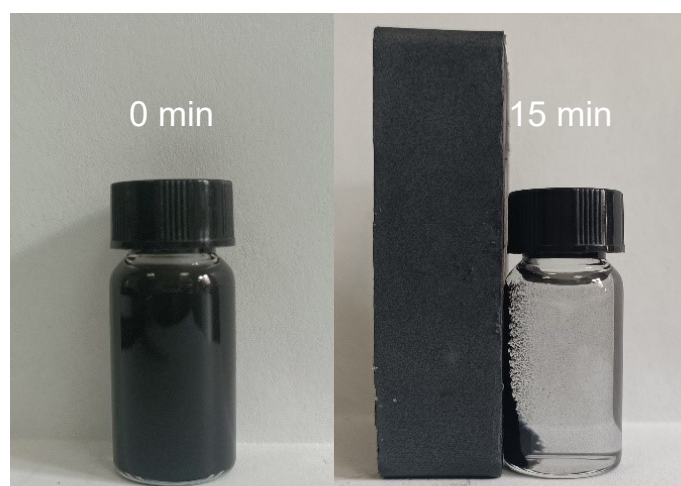

**Figure S4.** Recyclability of PtRuCoCuNi/CNFs.

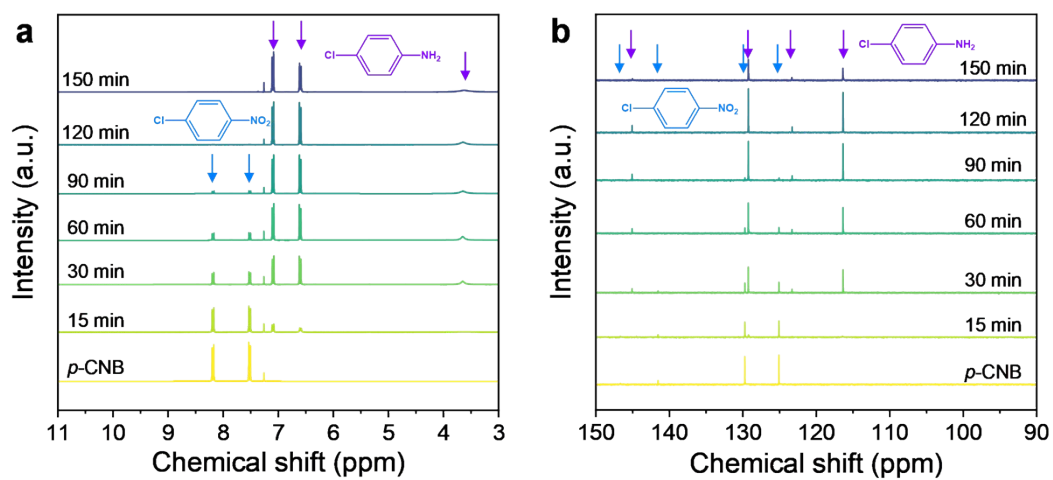

**Figure S5.** NMR product analysis of *p*-CNB and products with different reaction times. (a) <sup>1</sup>H-NMR. (b) <sup>13</sup>C-NMR.

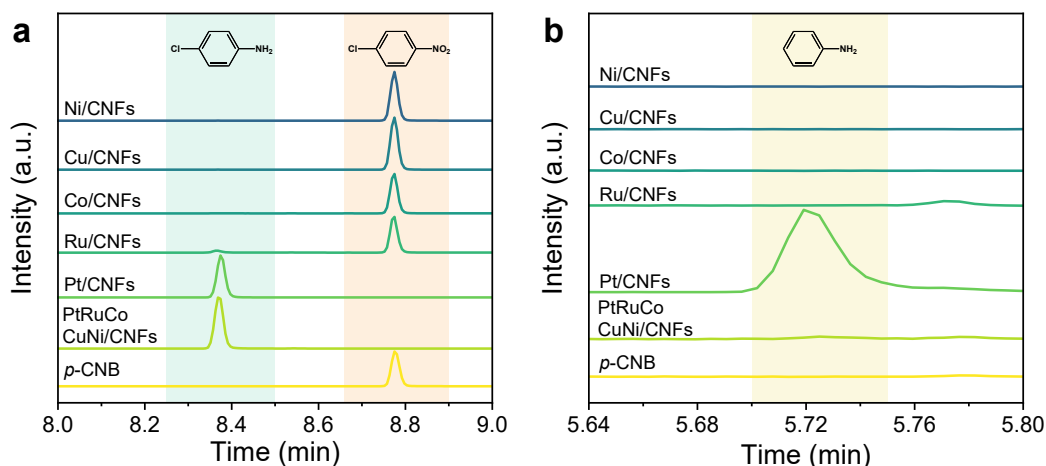

**Figure S6.** (a) GC analysis of the products after catalytic *p*-CNB hydrogenation by PtRuCoCuNi/CNFs and five monometallic catalysts. (b) Distribution of the by-product aniline.

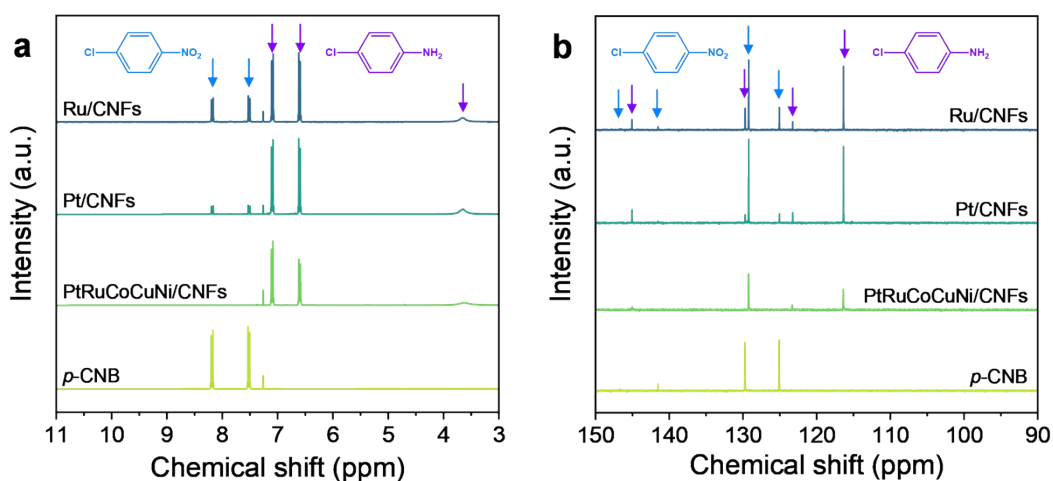

**Figure S7.** NMR analysis of *p*-CNB before and after hydrogenation with different catalysts. (a)  $^1\text{H}$ -NMR. (b)  $^{13}\text{C}$ -NMR.

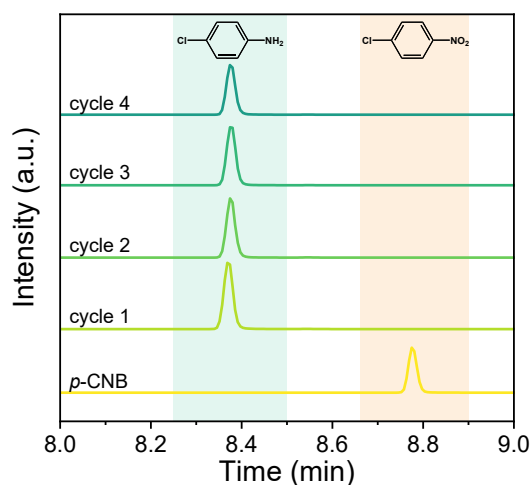

**Figure S8.** GC results of the products after reuse of PtRuCoCuNi/CNFs. After completion of hydrogenation, the catalyst was washed three times with ethanol and tetrahydrofuran, respectively, and then dried for the next hydrogenation experiment.

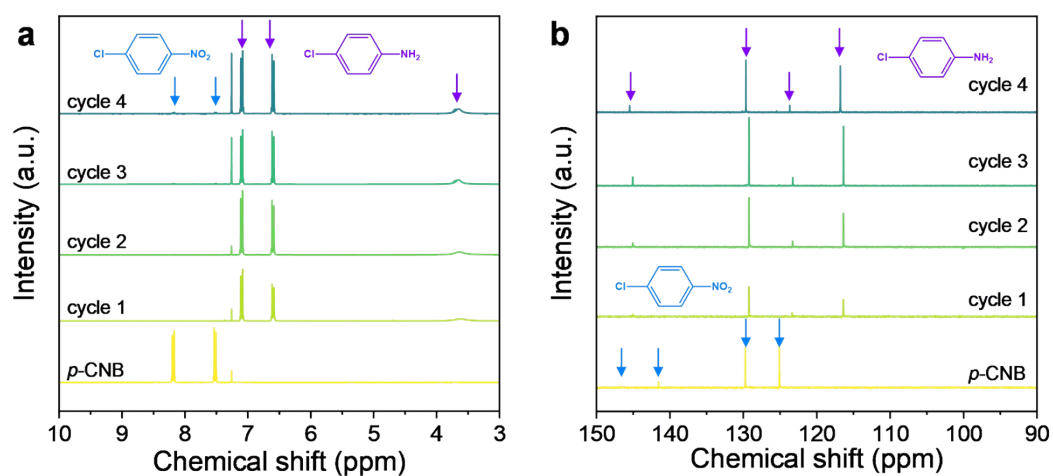

**Figure S9.** NMR results of the products after reuse of PtRuCoCuNi/CNFs. (a)  $^1\text{H-NMR}$ . (b)  $^{13}\text{C-NMR}$ .

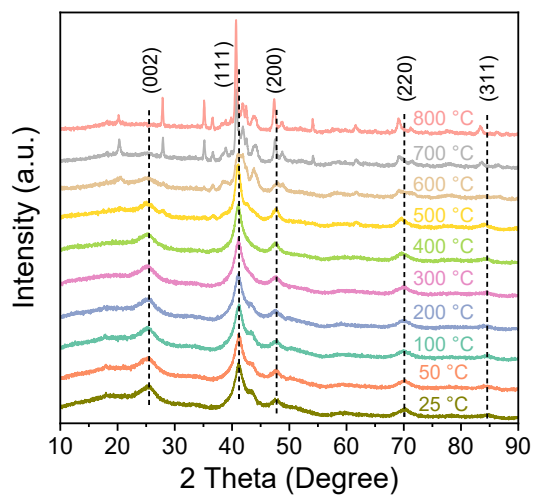

**Figure S10.** In-situ XRD spectrum of PtRuCoCuNi/CNFs.

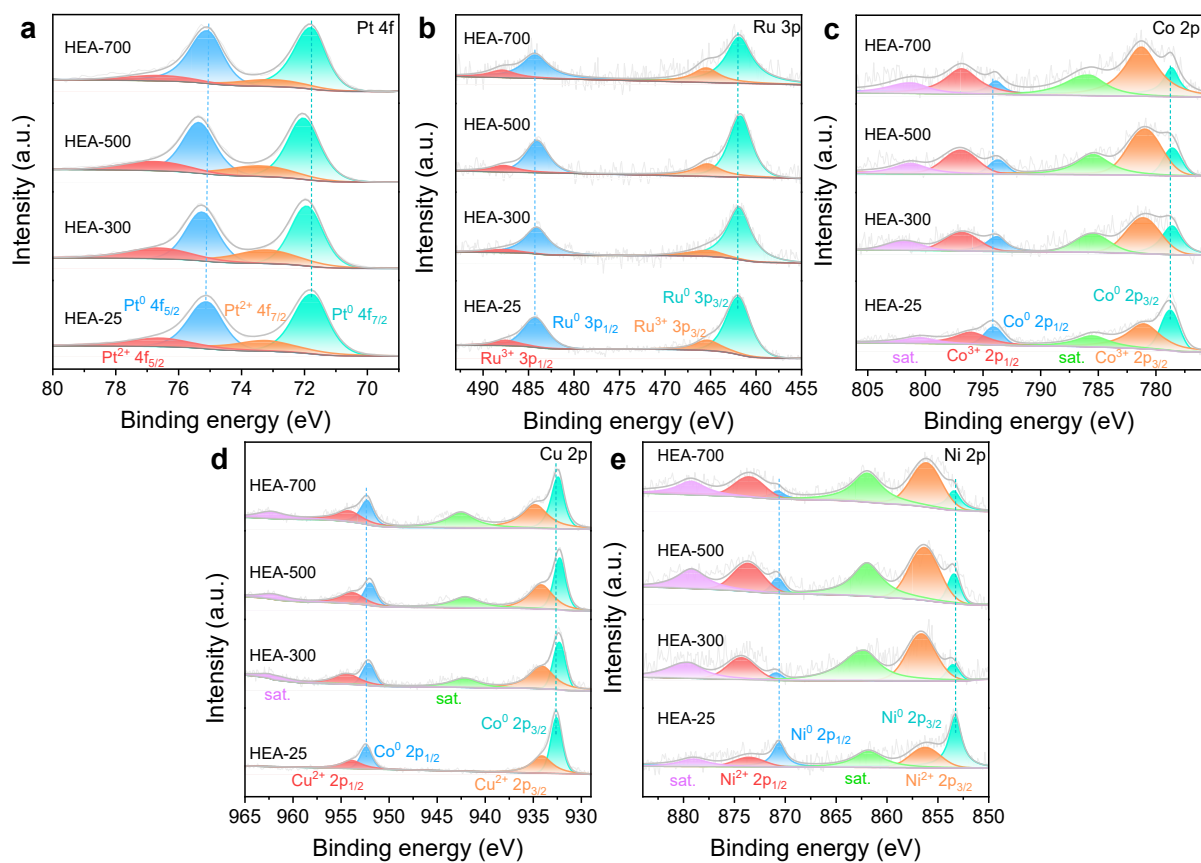

**Figure S11.** XPS high resolution spectra analysis of HEA-25, HEA-300, HEA-500, HEA-700. (a) Pt4f. (b) Ru3p. (c) Co 2p. (d) Cu 2p. (e) Ni 2p.

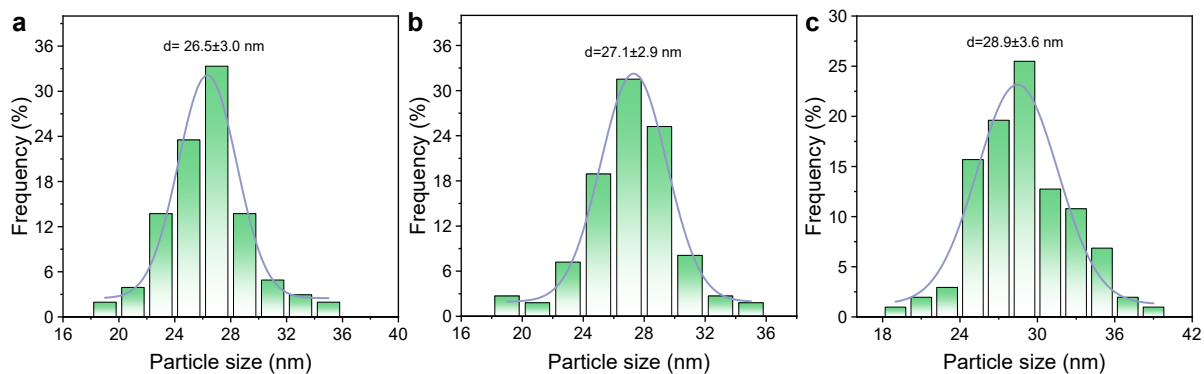

**Figure S12.** Particle size statistics of (a) HEA-300, (b) HEA-500, (c) HEA-700.

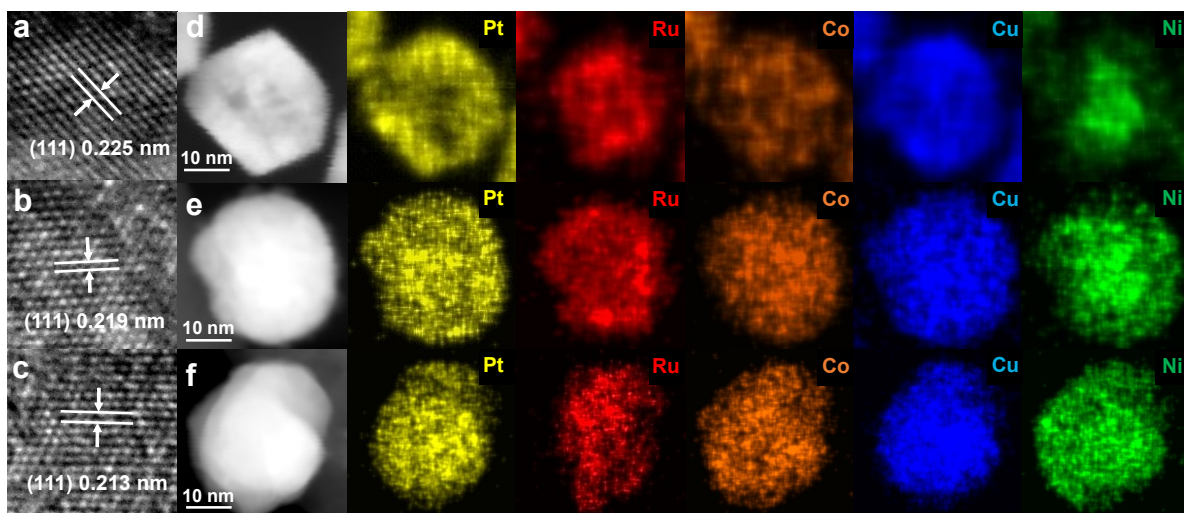

**Figure S13.** The corresponding elemental mapping of (a) HEA-300, (b) HEA-500, and (c) HEA-700.

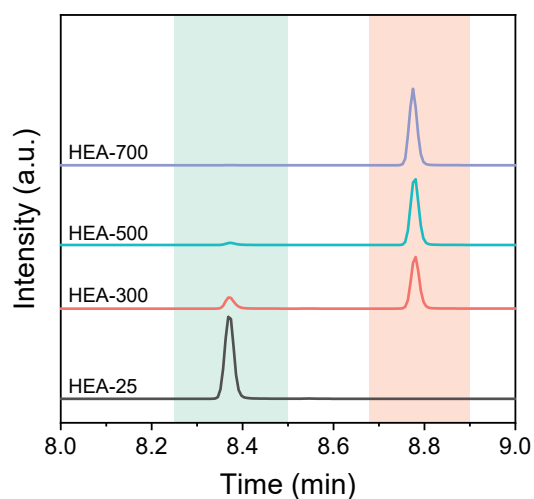

**Figure S14.** GC-MS results of *p*-CNB hydrogenation products catalyzed using HEA, HEA-300, HEA-500, HEA-700.

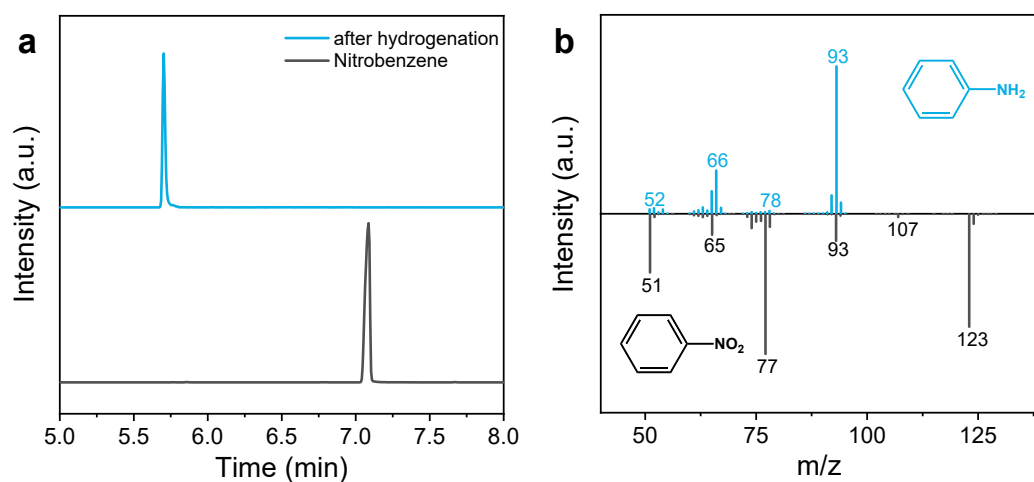

**Figure S15.** GC-MS results of nitrobenzene before and after hydrogenation. (a) GC results, (b) MS results.

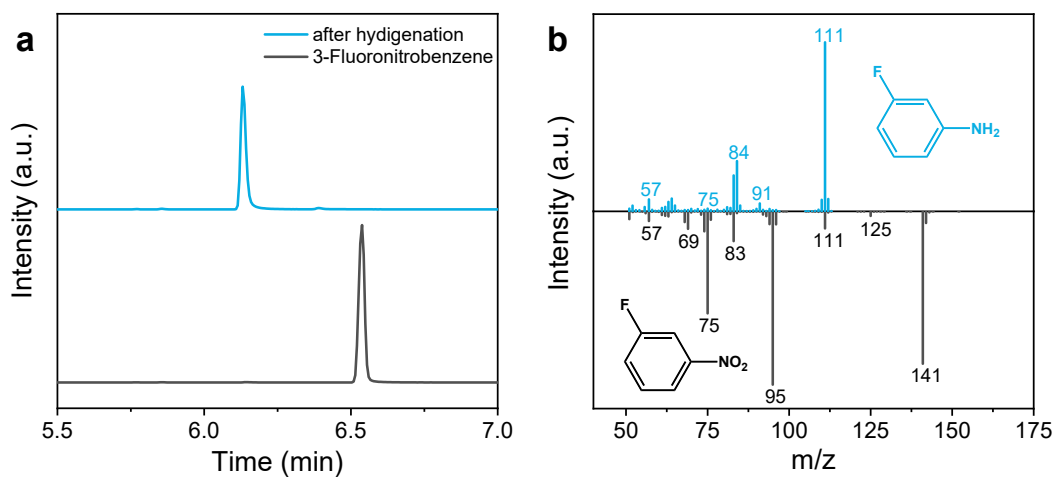

**Figure S16.** GC-MS results of 3-fluoronitrobenzene before and after hydrogenation. (a) GC results, (b)MS results.

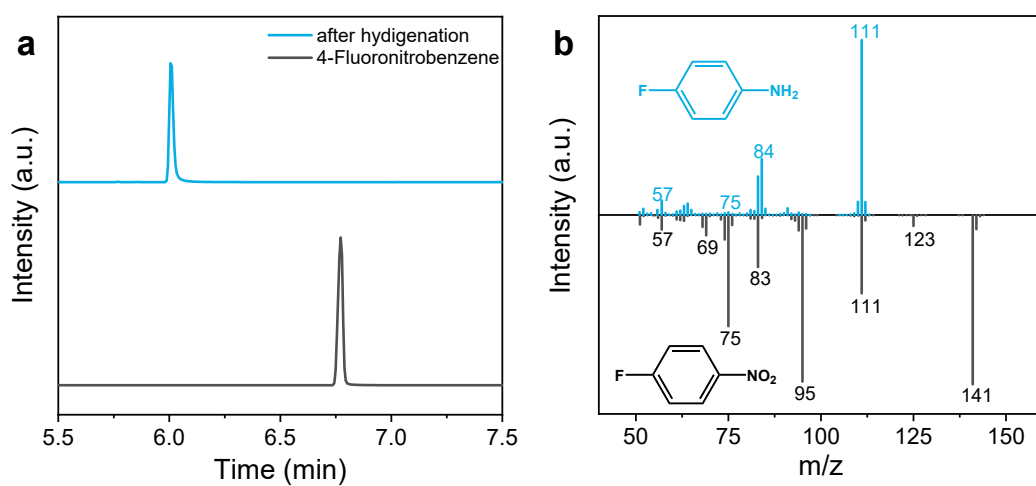

**Figure S17.** GC-MS results of 4-fluoronitrobenzene before and after hydrogenation. (a) GC results, (b)MS results.

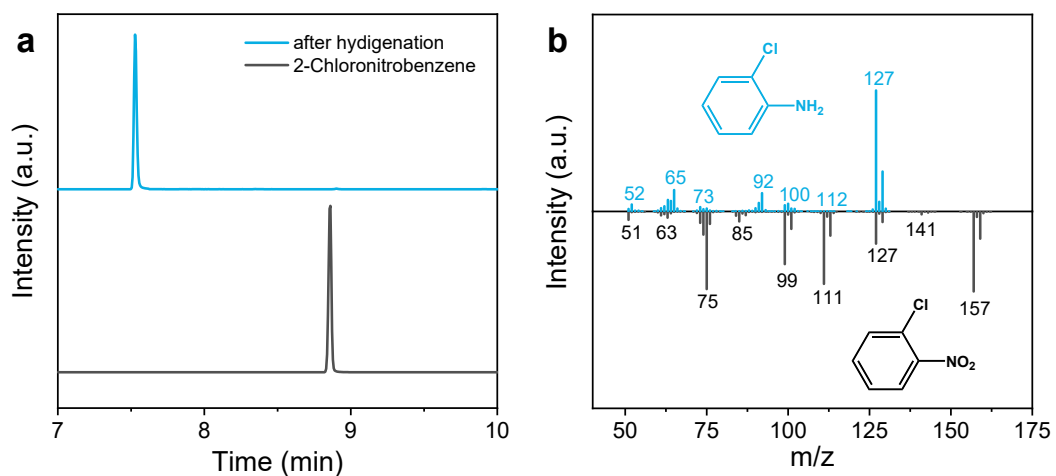

**Figure S18.** GC-MS results of 2-chloronitrobenzene before and after hydrogenation. (a) GC results, (b)MS results.



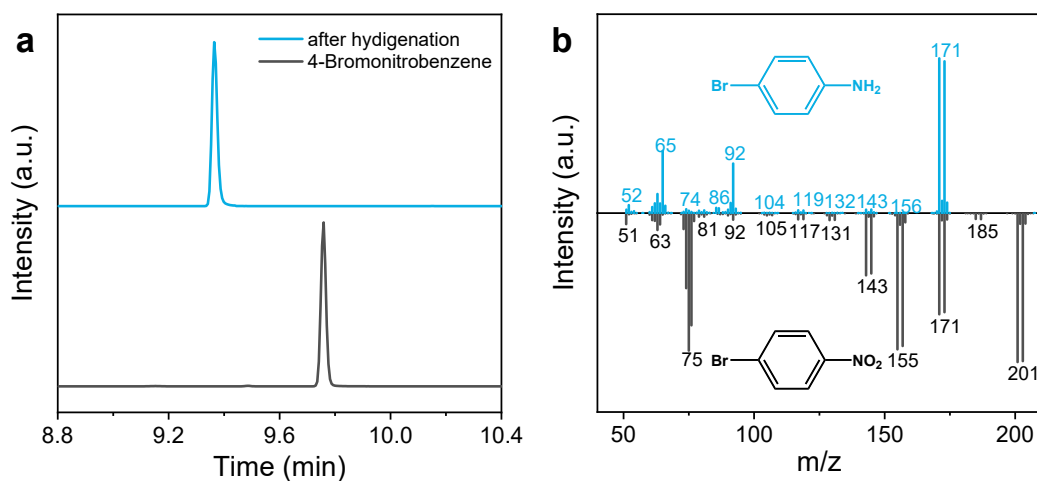

**Figure S19.** GC-MS results of 4-bromonitrobenzene before and after hydrogenation. (a) GC results, (b)MS results.

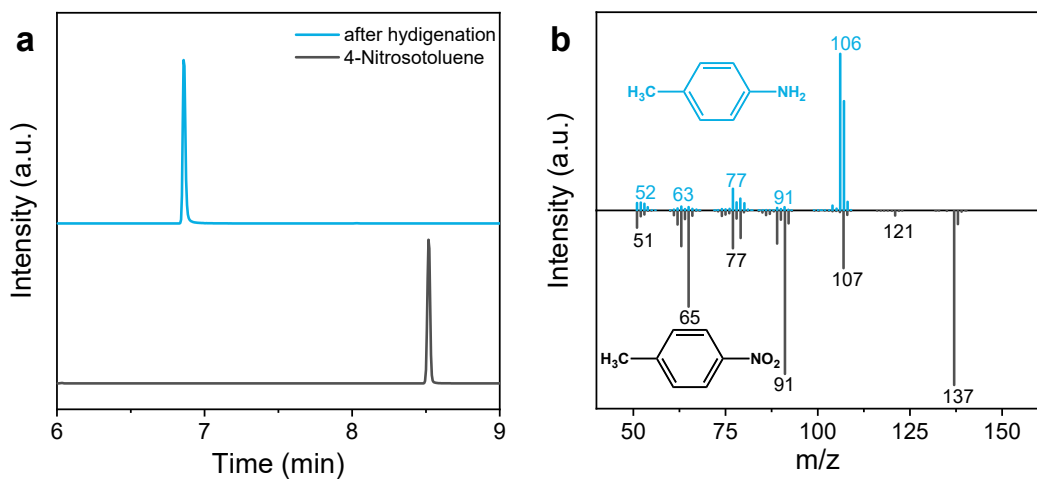

**Figure S20.** GC-MS results of 4-nitrosotoluene before and after hydrogenation. (a) GC results, (b)MS results.

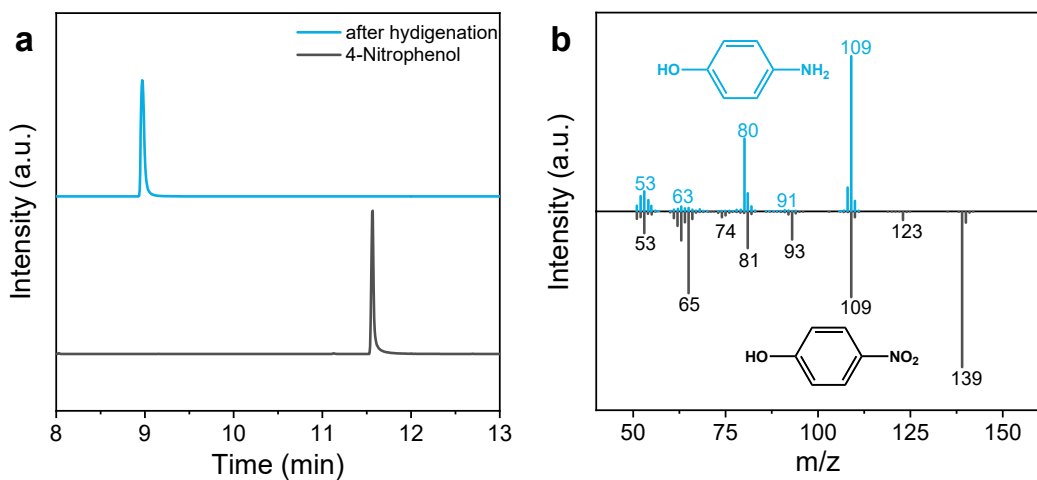

**Figure S21.** GC-MS results of 4-nitrophenol before and after hydrogenation. (a) GC results, (b)MS results.

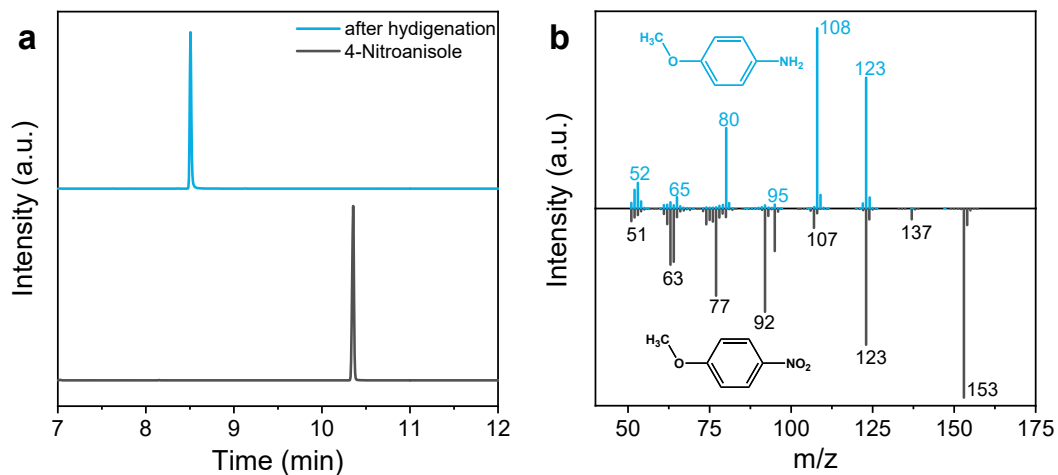

**Figure S22.** GC-MS results of 4-nitroanisole before and after hydrogenation. (a) GC results, (b)MS results.

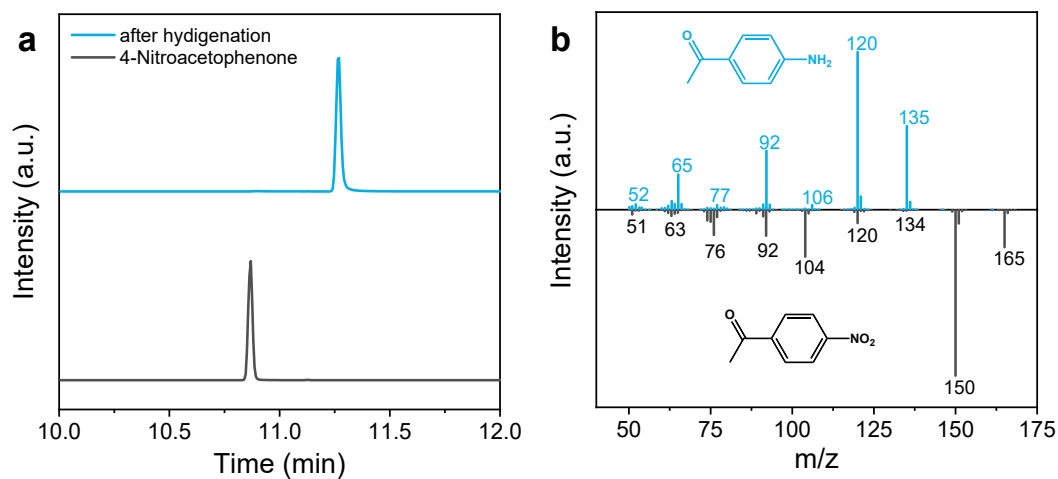

**Figure S23.** GC-MS results of 4-nitroacetophenone before and after hydrogenation. (a) GC results, (b)MS results.

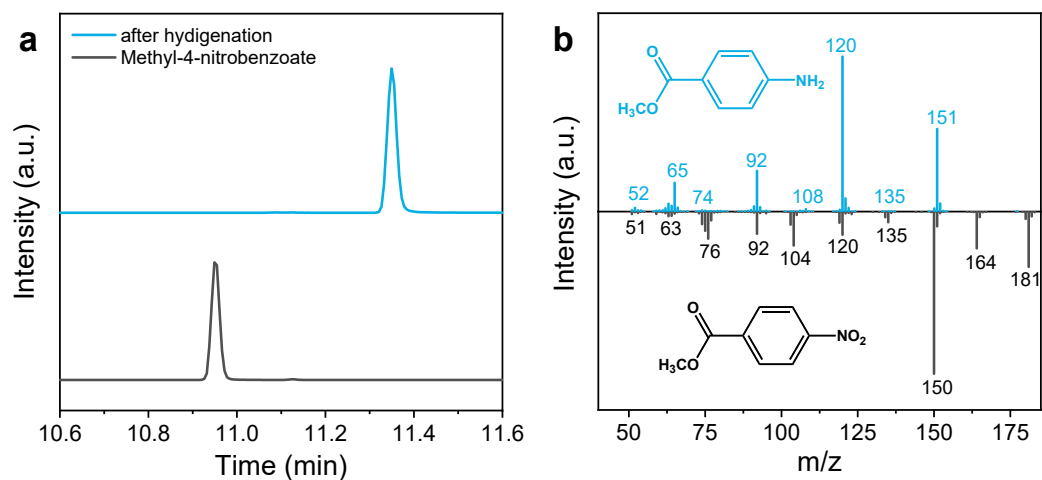

**Figure S24.** GC-MS results of methyl-4-nitrobenzoate before and after hydrogenation. (a) GC results, (b)MS results.

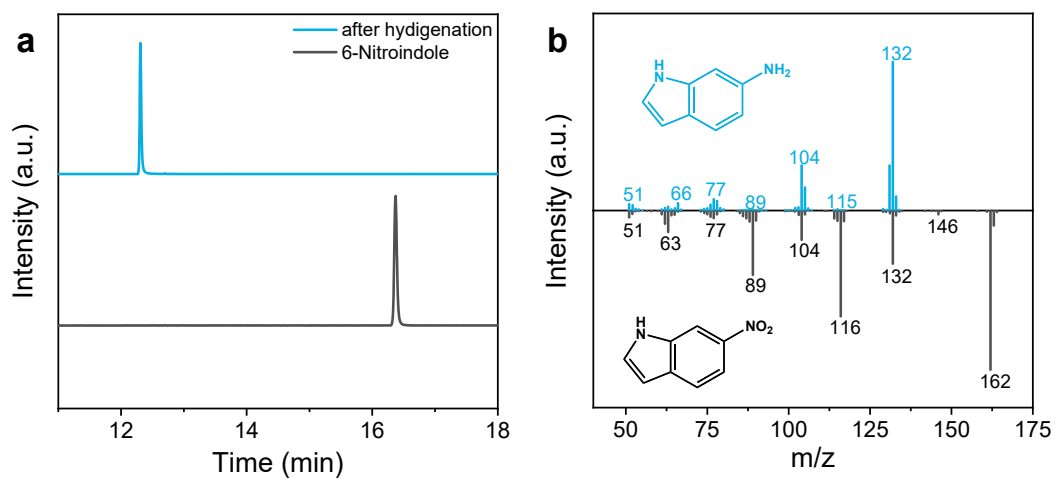

**Figure S25.** GC-MS results of 6-nitroindole before and after hydrogenation. (a) GC results, (b)MS results.

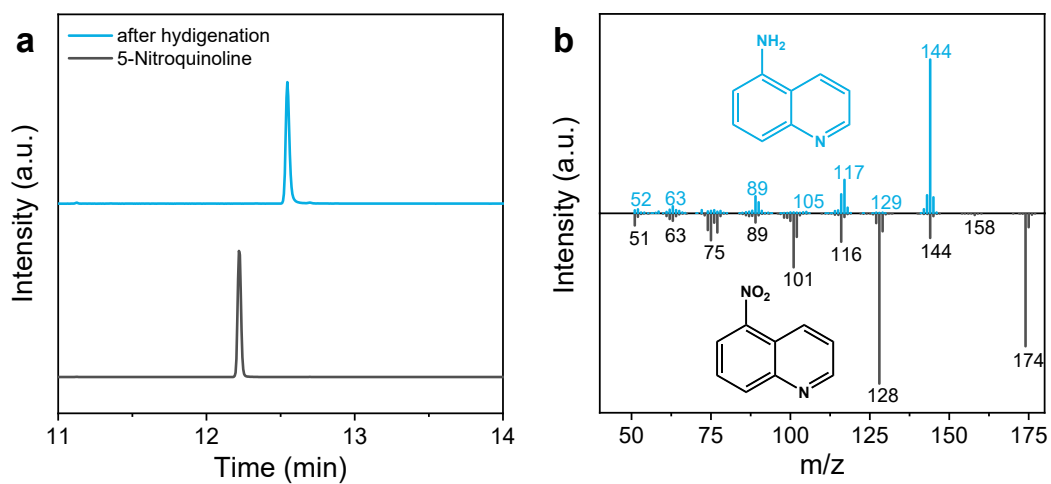

**Figure S26.** GC-MS results of 5-nitroquinoline before and after hydrogenation. (a) GC results, (b)MS results.

## 2. Supplementary Tables

**Table S1.** The (111) facet lattice fringes spacings of Pt, Ru, Cu, Ni, Co monometallic and PtRuCoCuNi/CNFs catalysts.

| Crystal facets | PtRuCoCuNi/CNFs (d/nm) | Pt (d/nm) | Ru (d/nm) | Cu (d/nm) | Ni (d/nm) | Co (d/nm) |
|----------------|------------------------|-----------|-----------|-----------|-----------|-----------|
| (111)          | 0.234                  | 0.227     | 0.221     | 0.209     | 0.204     | 0.205     |

**Table S2.** The total load and mono-metal load of catalysts.

| Catalysts       | Total load (wt%) | Pt (wt%) | Ru (wt%) | Co (wt%) | Cu (wt%) | Ni (wt%) |
|-----------------|------------------|----------|----------|----------|----------|----------|
| PtRuCoCuNi/CNFs | 24.46            | 10.12    | 5.28     | 2.85     | 3.09     | 3.12     |
| Pt/CNFs         | 29.89            | 29.89    | /        | /        | /        | /        |
| Ru//CNFs        | 20.72            | /        | 20.72    | /        | /        | /        |
| Co/CNFs         | 17.71            | /        | /        | 17.71    | /        | /        |
| Cu/CNFs         | 18.28            | /        | /        | /        | 18.28    | /        |
| Ni/CNFs         | 12.01            | /        | /        | /        | /        | 12.01    |

**Table S3.** Reaction conditions and catalytic performance of different catalysts in p-CNB hydrogenation reaction

| Catalysts                                          | Solvent                       | T/°C | P/MPa | Con./% | Sel./% | TOF*/h <sup>-1</sup> | Ref.      |
|----------------------------------------------------|-------------------------------|------|-------|--------|--------|----------------------|-----------|
| <i>pd</i> -Pt@Cu(0.11)/TiO <sub>2</sub>            | ethanol                       | 80   | 1     | 100    | 100    | 1941.5               | 1         |
| Fe@C-2                                             | methanol                      | 100  | 1.15  | 100    | >99    | 22.9                 | 2         |
| 15Cu@SiO <sub>2</sub>                              | ethanol                       | 110  | 2     | 100    | 99.3   | 75.4                 | 3         |
| PtCuCo/γ-Al <sub>2</sub> O <sub>3</sub>            | ethanol                       | 60   | 0.5   | 99.7   | 97.3   | 743.3                | 4         |
| Pd <sub>0.53</sub> Cu <sub>0.47</sub> /NC          | ethanol                       | 60   | 1     | 100    | 98.8   | 1515.2               | 5         |
| Co <sub>1</sub> @NC-(SBA)                          | ethanol                       | 90   | 1     | 99     | 99     | 32.6                 | 6         |
| Pt <sub>2</sub> /mpg-C <sub>3</sub> N <sub>4</sub> | isopropanol                   | 100  | 1     | 93     | 100    | 623.32               | 7         |
| Co@CN@HZM                                          | H <sub>2</sub> O              | 100  | 2     | 69.2   | 90     | 29.9                 | 8         |
| Co <sub>1</sub> /NSC-AT                            | methanol+<br>H <sub>2</sub> O | 85   | 0.5   | 100    | >99    | 59.9                 | 9         |
| PdsNC/PN-CeO <sub>2</sub>                          | methanol                      | 80   | 0.5   | 70     | 95.8   | 744.9                | 10        |
| Pd/N-CMK-3                                         | /                             | 85   | 1     | 100    | 87     | 1773.7               | 11        |
| Pd-MS-50-TMS                                       | /                             | 85   | 3.45  | 100    | 99.9   | 2529.2               | 12        |
| NiMo-10.7                                          | /                             | 80   | 0.1   | 99.7   | 96.2   | ---                  | 13        |
| PtRuCoCuNi/CNFs                                    | ethanol                       | 25   | 1     | 100    | 100    | 489.4                | This work |
| PtRuCoCuNi/CNFs                                    | /                             | 25   | 1     | 100    | 100    | 12.2                 | This work |

$$TOF = \frac{n_{p-CNB}}{n_{active\ metal} \times h}$$

\*:

**Table S4.** Change in binding energy of catalyst before and after heat treatment.

|                                   | HEA-25 | HEA-300 | HEA-500 | HEA-700 |
|-----------------------------------|--------|---------|---------|---------|
| Pt <sup>0</sup> 4f <sub>7/2</sub> | 71.77  | 71.93   | 72.03   | 71.79   |
| Ru <sup>0</sup> 3p <sub>3/2</sub> | 462.09 | 461.88  | 461.67  | 461.88  |
| Co <sup>0</sup> 2p <sub>3/2</sub> | 778.76 | 778.58  | 778.59  | 778.65  |
| Cu <sup>0</sup> 2p <sub>3/2</sub> | 932.69 | 932.30  | 932.25  | 932.41  |
| Ni <sup>0</sup> 2p <sub>3/2</sub> | 853.28 | 853.52  | 853.42  | 853.42  |

## Reference

1. D. H. Zhu, L. Long, J. Y. Sun, H. Q. Wan and S. R. Zheng, *Applied Surface Science*, 2020, **504**, 144329.
2. J.-X. Yu, X.-Y. Zhang, R.-K. Jiang, W. He, M.-Q. Xu, X.-T. Xu, Q.-Y. Xiang, C.-Y. Yin, Z.-L. Xiang, C.-F. Ma, Y. Liu, X.-N. Li and C.-S. Lu, *ACS Appl. Mater. Interfaces*, 2024, **16**, 8603-8615.
3. X. H. Li, R. H. Zhu, B. Q. Sun, L. K. Chen, H. W. Yang, X. H. Liu, Y. Guo and Y. Q. Wang, *Chemical Engineering Journal*, 2024, **487**, 150652.
4. A. H. Xiao, H. W. Xu, H. J. Cui, Z. M. Cheng and Z. M. Zhou, *Applied Catalysis A: General*, 2023, **666**, 119424.
5. P. C. Li, X. Liu, M. R. Guo, Y. C. Pi, N. Wang, S. X. Bai, Y. Xu and Q. Sun, *Small Methods*, 2023, **7**, 2201356.
6. L. K. Zhang, N. Z. Shang, S. T. Gao, J. M. Wang, T. Meng, C. C. Du, T. D. Shen, J. Y. Huang, Q. H. Wu, H. J. Wang, Y. Q. Qiao, C. Wang, Y. J. Gao and Z. Wang, *ACS Catalysis*, 2020, **10**, 8672-8682.
7. S. B. Tian, B. X. Wang, W. B. Gong, Z. Z. He, Q. Xu, W. X. Chen, Q. H. Zhang, Y. Q. Zhu, J. R. Yang, Q. Fu, C. Chen, Y. X. Bu, L. Gu, X. M. Sun, H. J. Zhao, D. S. Wang and Y. D. Li, *Nature Communications*, 2021, **12**, 3181.
8. H. X. Zhang, W. W. Fan, Q. H. Xia and H. M. Yang, *Chemical Engineering Journal*, 2023, **469**, 143870.
9. G.-J. Zhang, F.-Y. Tang, X. Wang, L.-Q. Wang and Y.-N. Liu, *ACS Catal.*, 2022, **12**, 5786-5794.
10. S. Zhang, C.-R. Chang, Z.-Q. Huang, J. Li, Z. Wu, Y. Ma, Z. Zhang, Y. Wang and Y. Qu, *J. Am. Chem. Soc.*, 2016, **138**, 2629-2637.
11. H. G. Huang, X. G. Wang, M. W. Tan, C. J. Chen, X. J. Zou, W. Z. Ding and X. G. Lu, *ChemCatChem*, 2016, **8**, 1485-1489.
12. W. Yu, H.-W. Lin and C.-S. Tan, *Chemical Engineering Journal*, 2017, **325**, 124-133.
13. D. Liu, P. S. Zhao, H. Zhang, M. J. Liu, J. Y. Wang, G. M. Zhao and Q. B. Guo, *Chinese Journal of Chemical Engineering*, 2021, **33**, 175-180.
